# Supplementary material for: Chemical reactivity and long-range transport potential of polycyclic aromatic hydrocarbons – a review
Source: Royal Society of Chemistry journal article supplement (doi:10.1039/c3cs60147a), 2013-01-01
Supplement: c3cs60147a.pdf [file c3cs60147a.pdf]

**Table S1. Summary of individual oxy-PAH compounds identified in A) ambient measurements; B) direct emissions; and C) reaction product studies**

|                                    | A<br>Ambient Measurements  |                                    |                                         | B<br>Direct Emissions               |                               | C<br>Laboratory Reaction Products |            |                                |
|------------------------------------|----------------------------|------------------------------------|-----------------------------------------|-------------------------------------|-------------------------------|-----------------------------------|------------|--------------------------------|
| Compound                           | Location                   | Details                            | Reference                               | Details                             | Reference                     | Reactants                         | Conditions | Reference                      |
| <b>1,2-Naphthoquinone</b>          | California, USA            | PM2.5, urban area                  | Cho et al. <sup>401</sup>               | Diesel Exhaust Particles            | Cho et al. <sup>401</sup>     |                                   |            |                                |
|                                    | Fresno, California, USA    | Atmospheric particles              | Chung et al. <sup>402</sup>             | Diesel and gasoline vehicle exhaust | Jakober et al. <sup>433</sup> |                                   |            |                                |
|                                    | Southern California, USA   | Gas and particulate phase          | Eiguren-Fernandez et al. <sup>404</sup> |                                     |                               |                                   |            |                                |
|                                    | Athens, Greece             | Airborne particles                 | Valavandis et al. <sup>423</sup>        |                                     |                               |                                   |            |                                |
| <b>1,4-Naphthoquinone</b>          | Boston, USA                | Atmospheric particles – urban area | Allen et al. <sup>398</sup>             | Diesel Exhaust Particles            | Cho et al. <sup>401</sup>     | Naphthalene + OH                  | Gas-phase  | Sasaki et al. <sup>182</sup>   |
|                                    | California, USA            | PM2.5, urban areas                 | Cho et al. <sup>401</sup>               | Fireplace wood combustion           | Fine et al. <sup>427</sup>    | Naphthalene + NO <sub>3</sub>     | Gas-phase  | Sasaki et al. <sup>182</sup>   |
|                                    | Fresno, California, USA    | Atmospheric particles              | Chung et al. <sup>402</sup>             | Diesel and gasoline vehicle exhaust | Jakober et al. <sup>433</sup> | Naphthalene + OH                  | Gas-phase  | Bunce et al. <sup>183</sup>    |
|                                    | Tempe, Arizona, USA        | PM2.5, urban area                  | Delhomme et al. <sup>403</sup>          | Diesel vehicles                     | Oda et al. <sup>434</sup>     | Naphthalene + OH                  | Gas-phase  | Lee and Lane <sup>181</sup>    |
|                                    | Southern California, USA   | Gas and particulate phase          | Eiguren-Fernandez et al. <sup>404</sup> | Gasoline vehicles                   | Oda et al. <sup>434</sup>     | Naphthalene + OH                  | Gas-phase  | Kautzman et al. <sup>184</sup> |
|                                    | Augsburg, Germany          | Particulate and vapour-phase       | Liu et al. <sup>410</sup>               | Roadway tunnel (traffic emissions)  | Oda et al. <sup>434</sup>     |                                   |            |                                |
|                                    | Paris, France              | Particulate Matter                 | Nicol et al. <sup>413</sup>             | Roadway tunnel (traffic emissions)  | Oda et al. <sup>435</sup>     |                                   |            |                                |
|                                    | Santiago and Temuco, Chile | PM2.5, urban areas                 | Tsapakis et al. <sup>422</sup>          |                                     |                               |                                   |            |                                |
|                                    | Santiago, Chile            | PM10, Urban area                   | Sienra <sup>418</sup>                   |                                     |                               |                                   |            |                                |
|                                    | Augsberg, Germany          | PM2.5, urban area                  | Sklorz et al. <sup>420</sup>            |                                     |                               |                                   |            |                                |
| Athens, Greece                     | Airborne particles         | Valavandis et al. <sup>423</sup>   |                                         |                                     |                               |                                   |            |                                |
| <b>2-Methyl-1,4-Naphthoquinone</b> |                            |                                    |                                         | Diesel and gasoline vehicle exhaust | Jakober et al. <sup>433</sup> |                                   |            |                                |
| <b>2,3-Epoxy-naphthoquinone</b>    |                            |                                    |                                         |                                     |                               | Naphthalene + OH                  | Gas-phase  | Sasaki et al. <sup>182</sup>   |
| <b>1- / 2-Naphthol</b>             | Taiyuan, China             | Atmospheric particles              | Simoneit et al. <sup>419</sup>          | Agricultural burning                | Hays et al. <sup>430</sup>    | Naphthalene + OH                  | Gas-phase  | Atkinson et al. <sup>162</sup> |
|                                    |                            |                                    |                                         |                                     |                               | Naphthalene + OH                  | Gas-phase  | Bunce et al. <sup>183</sup>    |
|                                    |                            |                                    |                                         |                                     |                               | Naphthalene + OH                  | Gas-phase  | Lee and Lane <sup>181</sup>    |
|                                    |                            |                                    |                                         |                                     |                               | Naphthalene + OH                  | Gas-phase  | Sasaki et al. <sup>182</sup>   |
|                                    |                            |                                    |                                         |                                     |                               | Naphthalene + NO <sub>3</sub>     | Gas-phase  | Sasaki et al. <sup>182</sup>   |

|                                          |                                                                                |                                                                                                                                                          |                                                                                                                                     |                                                                                                                |                                                                                                                                               |                                                                                                                                                                                                                                                                                                                                   |  |  |
|------------------------------------------|--------------------------------------------------------------------------------|----------------------------------------------------------------------------------------------------------------------------------------------------------|-------------------------------------------------------------------------------------------------------------------------------------|----------------------------------------------------------------------------------------------------------------|-----------------------------------------------------------------------------------------------------------------------------------------------|-----------------------------------------------------------------------------------------------------------------------------------------------------------------------------------------------------------------------------------------------------------------------------------------------------------------------------------|--|--|
| <b>Methyl-naphthol isomers</b>           | Taiyuan, China                                                                 | Atmospheric particles                                                                                                                                    | Simoneit et al. <sup>419</sup>                                                                                                      | Wood combustion<br>Agricultural burning<br>Charcoal production                                                 | Fitzpatrick et al. <sup>428</sup><br>Hays et al. <sup>430</sup><br>Re-Poppi and Santiago-Silva <sup>437</sup>                                 |                                                                                                                                                                                                                                                                                                                                   |  |  |
| <b>Dimethyl-naphthol isomers</b>         | Taiyuan, China                                                                 | Atmospheric particles                                                                                                                                    | Simoneit et al. <sup>419</sup>                                                                                                      |                                                                                                                |                                                                                                                                               |                                                                                                                                                                                                                                                                                                                                   |  |  |
| <b>Phthalic anhydride</b>                |                                                                                |                                                                                                                                                          |                                                                                                                                     |                                                                                                                |                                                                                                                                               | Naphthalene + OH<br>Gas-phase<br>Sasaki et al. <sup>182</sup><br>Naphthalene + OH<br>Gas-phase<br>Lee and Lane <sup>187</sup>                                                                                                                                                                                                     |  |  |
| <b>1,3-idene-dione</b>                   |                                                                                |                                                                                                                                                          |                                                                                                                                     |                                                                                                                |                                                                                                                                               | Naphthalene + OH<br>Gas-phase<br>Lee and Lane <sup>187</sup>                                                                                                                                                                                                                                                                      |  |  |
| <b>2_Formylcinnamaldehyde</b>            |                                                                                |                                                                                                                                                          |                                                                                                                                     |                                                                                                                |                                                                                                                                               | Naphthalene + OH<br>Gas-phase<br>Bunce et al. <sup>183</sup><br>Naphthalene + OH<br>Gas-phase<br>Kautzman et al. <sup>184</sup><br>Naphthalene + OH<br>Gas-phase<br>Nishino et al. <sup>166</sup><br>Naphthalene + OH<br>Gas-phase<br>Sasaki et al. <sup>182</sup><br>Naphthalene + OH<br>Gas-phase<br>Wang et al. <sup>221</sup> |  |  |
| <b>2-Naphthalenecarboxylic acid</b>      |                                                                                |                                                                                                                                                          |                                                                                                                                     | Uncontrolled domestic waste combustion                                                                         | Sidhu et al. <sup>444</sup>                                                                                                                   |                                                                                                                                                                                                                                                                                                                                   |  |  |
| <b>Naphthalene-1,8-dicarboxylic acid</b> | Columbus, USA<br>Duisberg, Germany<br>Munich, Germany<br>Houston, Texas        | Airborne particles, residential area<br>Airborne particulate matter<br>Ambient air samples, particulate-phase<br>Ambient air, particulate- and gas-phase | Chuang et al. <sup>383</sup><br>Konig et al. <sup>407</sup><br>Schnelle-Kries et al. <sup>417</sup><br>Wilson et al. <sup>384</sup> | Diesel and gasoline vehicle exhaust                                                                            | Jakober et al. <sup>433</sup>                                                                                                                 | Acenaphthene + OH<br>Gas-phase<br>Reisen and Arey <sup>155</sup><br>Acenaphthylene + OH<br>Gas-phase<br>Reisen and Arey <sup>155</sup>                                                                                                                                                                                            |  |  |
| <b>1-/2-Naphthaldehyde</b>               | Marseilles, France<br>Alpine Valley locations, France                          | Urban, sub-urban and rural regions<br>Particulate and vapour-phase                                                                                       | Albinet et al. <sup>133</sup><br>Albinet et al. <sup>388</sup>                                                                      | Roadway tunnel (traffic emissions)<br>Charcoal production                                                      | Oda et al. <sup>435</sup><br>Re-Poppi and Santiago-Silva <sup>437</sup>                                                                       |                                                                                                                                                                                                                                                                                                                                   |  |  |
| <b>5,12-Naphthacenequinone</b>           | Augsburg, Germany<br>Santiago, Chile                                           | PM2.5<br>PM10, Urban area                                                                                                                                | Schnelle-Kreis et al. <sup>416</sup><br>Sienra <sup>418</sup>                                                                       | Diesel vehicles<br>Gasoline vehicles<br>Sintering furnace<br>Coal powder<br>Roadway tunnel (traffic emissions) | Oda et al. <sup>434</sup><br>Oda et al. <sup>434</sup><br>Oda et al. <sup>434</sup><br>Oda et al. <sup>434</sup><br>Oda et al. <sup>434</sup> |                                                                                                                                                                                                                                                                                                                                   |  |  |
| <b>Acenaphthoquinone</b>                 | Fresno, California, USA<br>Tempe, Arizona, USA<br>Nevada, USA<br>Paris, France | Atmospheric particles<br>PM2.5<br>Particulate Matter<br>Particulate Matter                                                                               | Chung et al. <sup>402</sup><br>Delhomme et al. <sup>403</sup><br>McDonald et al. <sup>411</sup><br>Nicol et al. <sup>413</sup>      | Diesel and gasoline vehicle exhaust<br>Diesel vehicles<br>Gasoline vehicles<br>Road tunnel (traffic emissions) | Jakober et al. <sup>433</sup><br>Oda et al. <sup>434</sup><br>Oda et al. <sup>434</sup><br>Oda et al. <sup>434</sup>                          |                                                                                                                                                                                                                                                                                                                                   |  |  |

|                                 |                                 |                                             |                                         |                                        |                                   |                                |                                 |                                 |
|---------------------------------|---------------------------------|---------------------------------------------|-----------------------------------------|----------------------------------------|-----------------------------------|--------------------------------|---------------------------------|---------------------------------|
|                                 | Santiago and Temuco, Chile      | PM2.5, urban areas                          | Tsapakis et al. <sup>422</sup>          | Roadway tunnel (traffic emissions)     | Oda et al. <sup>435</sup>         |                                |                                 |                                 |
| <b>1-Acenaphthenone</b>         | Boston, USA                     | Atmospheric particles – urban area          | Allen et al. <sup>398</sup>             | Wood combustion                        | Fitzpatrick et al. <sup>428</sup> |                                |                                 |                                 |
| <b>Acenaphthylene-1,2-dione</b> | Paris, France                   | Particulate Matter                          | Nicol et al. <sup>413</sup>             |                                        |                                   |                                |                                 |                                 |
| <b>1,2-Naphthalic anhydride</b> |                                 |                                             |                                         |                                        |                                   | Phenanthrene + OH              | Gas-phase                       | Lee and Lane <sup>187</sup>     |
| <b>1,8-Naphthalic anhydride</b> | Boston, USA                     | Atmospheric particles – urban area          | Allen et al. <sup>398</sup>             |                                        |                                   | Acenaphthene + OH              | Gas-phase                       | Reisen and Arey <sup>155</sup>  |
|                                 | Tokyo, Japan                    | Urban particulate matter, urban region      | Kojima et al. <sup>387</sup>            |                                        |                                   |                                |                                 |                                 |
|                                 | Melpitz, Germany                | Fine particles (PM0.14-0.42)                | Neussus et al. <sup>412</sup>           |                                        |                                   |                                |                                 |                                 |
|                                 | Gwangju, Korea                  | PM2.5                                       | Park et al. <sup>414</sup>              |                                        |                                   |                                |                                 |                                 |
|                                 | Munich, Germany                 | Airborne particles, urban area              | Schnelle-Kries et al. <sup>417</sup>    |                                        |                                   |                                |                                 |                                 |
|                                 | Santiago and Temuco, Chile      | PM2.5, urban areas                          | Tsapakis et al. <sup>422</sup>          |                                        |                                   |                                |                                 |                                 |
| <b>1,4-Phenanthrequinone</b>    |                                 |                                             |                                         |                                        |                                   | Phenanthrene + OH              | Gas-phase                       | Lee and Lane <sup>187</sup>     |
| <b>9,10-Phenanthrequinone</b>   | Boston, USA                     | Atmospheric particles – urban area          | Allen et al. <sup>398</sup>             | Diesel Exhaust Particles               | Cho et al. <sup>401</sup>         | Phenanthrene + OH              | Gas-phase                       | Lee and Lane <sup>187</sup>     |
|                                 | Athens, Greece                  | Coarse and fine organic PM, two urban sites | Andreou and Rapsomanikis <sup>225</sup> | Diesel and gasoline vehicle exhaust    | Jakober et al. <sup>433</sup>     | Phenanthrene + OH              | Gas-phase                       | Wang et al. <sup>221</sup>      |
|                                 | Tempe, Arizona, USA             | PM2.5                                       | Delhomme et al. <sup>403</sup>          | Gasoline and diesel vehicle exhausts   | Rogge et al. <sup>440</sup>       | Phenanthrene + NO <sub>3</sub> | Gas-phase                       | Wang et al. <sup>221</sup>      |
|                                 | Los Angeles Basin, USA          | Particle phase.                             | Eiguren-Fernandez et al. <sup>390</sup> | Brake lining particles                 | Rogge et al. <sup>439</sup>       | Phenanthrene + O <sub>3</sub>  | Gas-phase                       | Wang et al. <sup>221</sup>      |
|                                 | Southern California, USA        | Gas and particulate phase                   | Eiguren-Fernandez et al. <sup>404</sup> | Road dust particles                    | Rogge et al. <sup>439</sup>       |                                |                                 |                                 |
|                                 | Nagasaki, Japan                 | Particulate phase, Urban site               | Kishikawa et al. <sup>405</sup>         | Natural gas home appliances            | Rogge et al. <sup>438</sup>       |                                |                                 |                                 |
|                                 | Munich, Germany                 | Generated soot particles; and road-side air | Lintelmann et al. <sup>408</sup>        | Wood burning in residential fireplaces | Rogge et al. <sup>442</sup>       |                                |                                 |                                 |
|                                 | Munich, Germany                 | PM2.5, road-side air samples                | Lintelmann et al. <sup>409</sup>        |                                        |                                   |                                |                                 |                                 |
|                                 | Santiago and Temuco, Chile      | PM2.5, urban areas                          | Tsapakis et al. <sup>422</sup>          |                                        |                                   |                                |                                 |                                 |
| <b>9,10-Anthraquinone</b>       | Marseilles, France              | Urban, sub-urban and rural regions          | Albinet et al. <sup>133</sup>           | Diesel Exhaust Particles               | Cho et al. <sup>401</sup>         | Anthracene + NO <sub>2</sub>   | Particle-phase, Silica          | Ma et al. <sup>278</sup>        |
|                                 | Alpine Valley locations, France | Particulate and vapour-phase                | Albinet et al. <sup>388</sup>           | Fireplace wood combustion              | Fine et al. <sup>427</sup>        | Anthracene + NO <sub>2</sub>   | Particle-phase, MgO             | Ma et al. <sup>278</sup>        |
|                                 | Pertouli, Greece                | Particulate Matter                          | Alves and Pio <sup>399</sup>            | Wood combustion                        | Fitzpatrick et al. <sup>428</sup> | Anthracene + O <sub>3</sub>    | Particle-phase, Pyrex           | Kwamena et al. <sup>292</sup>   |
|                                 | Athens, Greece                  | Coarse and fine organic PM, two urban sites | Andreou and Rapsomanikis <sup>225</sup> | Motor vehicle traffic, Roadway tunnel  | Fraser et al. <sup>429</sup>      | Anthracene + O <sub>3</sub>    | Particle, air-aqueous interface | Mmerekki et al. <sup>294</sup>  |
|                                 | Barcelona, Spain                | Airborne particulate matter                 | Bayona et al. <sup>381</sup>            | Agricultural burning                   | Hays et al. <sup>430</sup>        | Anthracene + O <sub>3</sub>    | Particle-phase, silica          | Perraudin et al. <sup>303</sup> |

|                                        |                                                                                                                                                                                                                                                                                                                                                                                 |                                                                                                                                                                                                                                                                                                                                                                                                                                                                                              |                                                                                                                                                                                                                                                                                                                                                                                                                                                                                                                                                                                            |                                                                                                                                                                                                                                                                                                                                                                                                                                                                                                                                                |                                                                                                                                                                                                                                                                                                                                                                                                                                                                                                                                            |                              |                              |                             |
|----------------------------------------|---------------------------------------------------------------------------------------------------------------------------------------------------------------------------------------------------------------------------------------------------------------------------------------------------------------------------------------------------------------------------------|----------------------------------------------------------------------------------------------------------------------------------------------------------------------------------------------------------------------------------------------------------------------------------------------------------------------------------------------------------------------------------------------------------------------------------------------------------------------------------------------|--------------------------------------------------------------------------------------------------------------------------------------------------------------------------------------------------------------------------------------------------------------------------------------------------------------------------------------------------------------------------------------------------------------------------------------------------------------------------------------------------------------------------------------------------------------------------------------------|------------------------------------------------------------------------------------------------------------------------------------------------------------------------------------------------------------------------------------------------------------------------------------------------------------------------------------------------------------------------------------------------------------------------------------------------------------------------------------------------------------------------------------------------|--------------------------------------------------------------------------------------------------------------------------------------------------------------------------------------------------------------------------------------------------------------------------------------------------------------------------------------------------------------------------------------------------------------------------------------------------------------------------------------------------------------------------------------------|------------------------------|------------------------------|-----------------------------|
|                                        | Barcelona, Spain<br>Fresno, California, USA<br>Tempe, Arizona, USA<br>Southern California, USA<br>Tokyo, Japan<br>Duisberg, Germany<br>Portland, Oregon, USA<br>Augsburg, Germany<br>Paris, France<br>Copenhagen, Denmark<br>Munich, Germany<br>Augsburg, Germany<br>Santiago, Chile<br>Stockholm, Sweden<br>Santiago and Temuco, Chile<br>Finokalia, Crete<br>Algiers, Algeria | Urban aerosols<br>Atmospheric particles<br>PM2.5<br>Gas and particulate phase<br>Urban particulate matter, urban region<br>Airborne particulate matter<br>Gas and particulate phase<br>Particulate and vapour-phase<br>Particulate Matter<br>Airborne PM<br>Ambient air samples, particulate-phase<br>PM2.5<br>PM10<br>Airborne Particulates, heavy traffic area<br>PM2.5, urban areas<br>Particulate and vapour-phase, Mediterranean marine background<br>Airborne particulates, urban area | Castells et al. <sup>400</sup><br>Chung et al. <sup>402</sup><br>Delhomme et al. <sup>403</sup><br>Eiguren-Fernandez et al. <sup>404</sup><br>Kojima et al. <sup>387</sup><br>Konig et al. <sup>407</sup><br>Ligocki and Pankow <sup>426</sup><br>Liu et al. <sup>410</sup><br>Nicol et al. <sup>413</sup><br>Nielsen et al. <sup>12</sup><br>Schnelle-Kries et al. <sup>417</sup><br>Schnelle-Kreis et al. <sup>416</sup><br>Sienra <sup>418</sup><br>Strandell et al. <sup>421</sup><br>Tsapakis et al. <sup>422</sup><br>Tsapakis et al. <sup>377</sup><br>Yassaa et al. <sup>424</sup> | Biomass burning<br>Diesel and gasoline vehicle exhaust<br>Diesel vehicles<br>Gasoline vehicles<br>Road tunnel (traffic emissions)<br>Sintering furnace<br>Coal powder<br>Roadway tunnel (traffic emissions)<br>Gasoline and diesel vehicle exhausts<br>Road dust particles<br>Brake lining particles<br>Natural gas home appliances<br>Distillate fuel oil combustion for Industrial-scale boilers<br>Gasoline and diesel vehicle exhausts<br>Uncontrolled domestic waste combustion<br>Gasoline and diesel vehicle exhausts<br>Diesel exhaust | Linuma et al. <sup>431</sup><br>Jakober et al. <sup>433</sup><br>Oda et al. <sup>434</sup><br>Oda et al. <sup>435</sup><br>Rogge et al. <sup>440</sup><br>Rogge et al. <sup>439</sup><br>Rogge et al. <sup>439</sup><br>Rogge et al. <sup>438</sup><br>Rogge et al. <sup>441</sup><br>Sidhu et al. <sup>444</sup><br>Sidhu et al. <sup>444</sup><br>Strandell et al. <sup>421</sup><br>Zielinska et al. <sup>446</sup> | Anthracene + NO <sub>3</sub> | Particle-phase, azelaic acid | Zhang et al. <sup>259</sup> |
| <b>2-Methylanthraquinone</b>           | Athens, Greece<br>Barcelona, Spain<br>Tempe, Arizona, USA                                                                                                                                                                                                                                                                                                                       | Coarse and fine organic PM, two urban sites<br>Urban aerosols<br>PM2.5                                                                                                                                                                                                                                                                                                                                                                                                                       | Andreou and Rapsomanikis <sup>225</sup><br>Castells et al. <sup>400</sup><br>Delhomme et al. <sup>403</sup>                                                                                                                                                                                                                                                                                                                                                                                                                                                                                | Roadway tunnel (traffic emissions)<br>Diesel vehicles<br>Gasoline vehicles<br>Road tunnel (traffic emissions)<br>Sintering furnace<br>Coal powder<br>Natural gas home appliances<br>Lignite combustion                                                                                                                                                                                                                                                                                                                                         | Oda et al. <sup>435</sup><br>Oda et al. <sup>434</sup><br>Oda et al. <sup>434</sup><br>Oda et al. <sup>434</sup><br>Oda et al. <sup>434</sup><br>Oda et al. <sup>434</sup><br>Rogge et al. <sup>438</sup><br>Stefanova et al. <sup>445</sup>                                                                                                                                                                                                                                                                                               |                              |                              |                             |
| <b>Aceanthraquinone</b>                | Fresno, California, USA<br>Tempe, Arizona, USA<br>Santiago, Chile                                                                                                                                                                                                                                                                                                               | Atmospheric particles<br>PM2.5<br>PM10, Urban area                                                                                                                                                                                                                                                                                                                                                                                                                                           | Chung et al. <sup>402</sup><br>Delhomme et al. <sup>403</sup><br>Sienra <sup>418</sup>                                                                                                                                                                                                                                                                                                                                                                                                                                                                                                     | Fireplace wood combustion<br>Diesel and gasoline vehicle exhaust<br>Roadway tunnel (traffic emissions)                                                                                                                                                                                                                                                                                                                                                                                                                                         | Fine et al. <sup>427</sup><br>Jakober et al. <sup>433</sup><br>Oda et al. <sup>435</sup>                                                                                                                                                                                                                                                                                                                                                                                                                                                   |                              |                              |                             |
| <b>9-Anthraldehyde</b>                 |                                                                                                                                                                                                                                                                                                                                                                                 |                                                                                                                                                                                                                                                                                                                                                                                                                                                                                              |                                                                                                                                                                                                                                                                                                                                                                                                                                                                                                                                                                                            | Roadway tunnel (traffic emissions)<br>Fireplace wood combustion                                                                                                                                                                                                                                                                                                                                                                                                                                                                                | Oda et al. <sup>435</sup><br>Fine et al. <sup>427</sup>                                                                                                                                                                                                                                                                                                                                                                                                                                                                                    |                              |                              |                             |
| <b>10H-Anthracene-9-one (Anthrone)</b> | Athens, Greece                                                                                                                                                                                                                                                                                                                                                                  | Coarse and fine organic PM, two urban sites                                                                                                                                                                                                                                                                                                                                                                                                                                                  | Andreou and Rapsomanikis <sup>225</sup>                                                                                                                                                                                                                                                                                                                                                                                                                                                                                                                                                    | Diesel vehicles                                                                                                                                                                                                                                                                                                                                                                                                                                                                                                                                | Oda et al. <sup>434</sup>                                                                                                                                                                                                                                                                                                                                                                                                                                                                                                                  |                              |                              |                             |

|                               |                                 |                                                               |                                            |                                                             |                                            |                                |           |                              |
|-------------------------------|---------------------------------|---------------------------------------------------------------|--------------------------------------------|-------------------------------------------------------------|--------------------------------------------|--------------------------------|-----------|------------------------------|
|                               | Paris, France                   | Particulate Matter                                            | Nicol et al. <sup>413</sup>                | Gasoline vehicles                                           | Oda et al. <sup>434</sup>                  |                                |           |                              |
|                               | Augsburg, Germany               | PM2.5                                                         | Schnelle-Kreis et al. <sup>416</sup>       | Sintering furnace                                           | Oda et al. <sup>434</sup>                  |                                |           |                              |
|                               | Santiago, Chile                 | PM10, Urban area                                              | Sienra <sup>418</sup>                      |                                                             |                                            |                                |           |                              |
| <b>9- Fluorenone</b>          | Marseilles, France              | Urban, sub-urban and rural regions                            | Albinet et al. <sup>133</sup>              | Wood combustion                                             | Fitzpatrick et al. <sup>428</sup>          | Phenanthrene + OH              | Gas-phase | Lee and Lane <sup>187</sup>  |
|                               | Alpine Valley locations, France | Particulate and vapour-phase                                  | Albinet et al. <sup>388</sup>              | Motor vehicle traffic, Roadway tunnel                       | Fraser et al. <sup>429</sup>               | Phenanthrene + OH              | Gas-phase | Wang et al. <sup>221</sup>   |
|                               | Boston, USA                     | Atmospheric particles – urban area                            | Allen et al. <sup>398</sup>                | Agricultural burning                                        | Hays et al. <sup>430</sup>                 | Phenanthrene + NO <sub>3</sub> | Gas-phase | Wang et al. <sup>221</sup>   |
|                               | Athens, Greece                  | Coarse and fine organic PM, two urban sites                   | Andreou and Rapsomanikis <sup>225</sup>    | Biomass burning                                             | Iinuma et al. <sup>431</sup>               | Phenanthrene + O <sub>3</sub>  | Gas-phase | Wang et al. <sup>221</sup>   |
|                               | Barcelona, Spain                | Airborne particulate matter                                   | Bayona et al. <sup>381</sup>               | Diesel and gasoline vehicle exhaust                         | Jakober et al. <sup>433</sup>              | Fluorene + OH                  | Gas-phase | Helmig et al. <sup>178</sup> |
|                               | Barcelona, Spain                | Urban aerosols                                                | Castells et al. <sup>400</sup>             | Roadway tunnel (traffic emissions)                          | Oda et al. <sup>435</sup>                  | Fluorene + OH                  | Gas-phase | Kwok et al. <sup>177</sup>   |
|                               | Columbus, USA                   | Airborne particles, residential area                          | Chuang et al. <sup>383</sup>               | Diesel vehicles                                             | Oda et al. <sup>434</sup>                  | Fluorene + NO <sub>3</sub>     | Gas-phase | Kwok et al. <sup>177</sup>   |
|                               | Tokyo, Japan                    | Urban particulate matter, urban region                        | Kojima et al. <sup>387</sup>               | Gasoline vehicles                                           | Oda et al. <sup>434</sup>                  |                                |           |                              |
|                               | Duisberg, Germany               | Airborne particulate matter                                   | Konig et al. <sup>407</sup>                | Road tunnel (traffic emissions)                             | Oda et al. <sup>434</sup>                  |                                |           |                              |
|                               | Portland, Oregon, USA           | Gas and particulate phase                                     | Ligocki and Pankow <sup>426</sup>          | Sintering furnace                                           | Oda et al. <sup>434</sup>                  |                                |           |                              |
|                               | Augsburg, Germany               | Particulate and vapour-phase                                  | Liu et al. <sup>410</sup>                  | Coal powder                                                 | Oda et al. <sup>434</sup>                  |                                |           |                              |
|                               | Paris, France                   | Particulate Matter                                            | Nicol et al. <sup>413</sup>                | Charcoal production                                         | Re-Poppi and Santiago-Silva <sup>437</sup> |                                |           |                              |
|                               | Campo Grande City, Brazil       | Particulate matter, ambient air                               | Re-Poppi and Santiago-Silva <sup>415</sup> | Uncontrolled domestic waste combustion                      | Sidhu et al. <sup>444</sup>                |                                |           |                              |
|                               | Munich, Germany                 | Particulate-phase                                             | Schnelle-Kries et al. <sup>417</sup>       | Diesel exhaust                                              | Sidhu et al. <sup>444</sup>                |                                |           |                              |
|                               | Augsburg, Germany               | PM2.5                                                         | Schnelle-Kreis et al. <sup>416</sup>       | Lignite combustion                                          | Stefanova et al. <sup>445</sup>            |                                |           |                              |
|                               | Santiago, Chile                 | PM10, Urban area                                              | Sienra <sup>418</sup>                      | PM 2.5 from motor vehicles                                  | Rao et al. <sup>436</sup>                  |                                |           |                              |
|                               | Santiago and Temuco, Chile      | PM2.5, Urban areas                                            | Tsapakis et al. <sup>422</sup>             | Gasoline and diesel vehicle exhausts                        | Rogge et al. <sup>440</sup>                |                                |           |                              |
|                               | Finokalia, Crete                | Particulate and vapour-phase, Mediterranean marine background | Tsapakis et al. <sup>377</sup>             | Brake lining particles                                      | Rogge et al. <sup>439</sup>                |                                |           |                              |
|                               |                                 |                                                               |                                            | Road dust particles                                         | Rogge et al. <sup>439</sup>                |                                |           |                              |
|                               |                                 |                                                               |                                            | Natural gas home appliances                                 | Rogge et al. <sup>438</sup>                |                                |           |                              |
|                               |                                 |                                                               |                                            | Distillate fuel oil combustion for Industrial-scale boilers | Rogge et al. <sup>441</sup>                |                                |           |                              |
|                               |                                 |                                                               |                                            | Diesel and gasoline-fuelled vehicles                        | Zielinska et al. <sup>446</sup>            |                                |           |                              |
| <b>2-Methyl-fluoren-9-one</b> |                                 |                                                               |                                            | Gasoline and diesel vehicle exhausts                        | Rogge et al. <sup>440</sup>                |                                |           |                              |
|                               |                                 |                                                               |                                            | Brake lining particles                                      | Rogge et al. <sup>439</sup>                |                                |           |                              |
|                               |                                 |                                                               |                                            | Road dust particles                                         | Rogge et al. <sup>439</sup>                |                                |           |                              |
|                               |                                 |                                                               |                                            | Natural gas home appliances                                 | Rogge et al. <sup>438</sup>                |                                |           |                              |
|                               |                                 |                                                               |                                            | Distillate fuel oil combustion for Industrial-scale boilers | Rogge et al. <sup>441</sup>                |                                |           |                              |

|                                          |                                                                                                                                |                                                                                                                                                                       |                                                                                                                                                                                                                |                                                                                                                                                                                                             |                                                                                                                                                                                                                                          |                                                                                      |                                     |                                                                                        |
|------------------------------------------|--------------------------------------------------------------------------------------------------------------------------------|-----------------------------------------------------------------------------------------------------------------------------------------------------------------------|----------------------------------------------------------------------------------------------------------------------------------------------------------------------------------------------------------------|-------------------------------------------------------------------------------------------------------------------------------------------------------------------------------------------------------------|------------------------------------------------------------------------------------------------------------------------------------------------------------------------------------------------------------------------------------------|--------------------------------------------------------------------------------------|-------------------------------------|----------------------------------------------------------------------------------------|
| <b>4-Hydroxy-9-fluorenone</b>            |                                                                                                                                |                                                                                                                                                                       |                                                                                                                                                                                                                | Wood combustion                                                                                                                                                                                             | Fitzpatrick et al. <sup>428</sup>                                                                                                                                                                                                        |                                                                                      |                                     |                                                                                        |
| <b>1-H-phenalen-1-one</b>                | Augsburg, Germany<br>Campo Grande City, Brazil<br>Augsburg, Germany                                                            | Particulate and vapour-phase<br>Particulate matter, ambient air<br>PM2.5                                                                                              | Liu et al. <sup>410</sup><br>Re-Poppi and Santiago-Silva <sup>415</sup><br>Schnelle-Kreis et al. <sup>416</sup>                                                                                                | Agricultural burning<br>Wood combustion<br>Charcoal production<br>Natural gas home appliances<br>Wood burning in residential fireplaces<br>Uncontrolled domestic waste combustion                           | Hays et al., 2005<br>Fitzpatrick et al. <sup>428</sup><br>Re-Poppi and Santiago-Silva <sup>437</sup><br>Rogge et al. <sup>438</sup><br>Rogge et al. <sup>442</sup><br>Sidhu et al. <sup>444</sup>                                        |                                                                                      |                                     |                                                                                        |
| <b>Phenanthrene-9-carboxaldehyde</b>     | Marseilles, France<br>Alpine Valley locations, France<br>Athens, Greece<br>Santiago, Chile                                     | Urban, sub-urban and rural regions<br>Particulate and vapour-phase<br>Coarse and fine organic PM, two urban sites<br>PM10, Urban area                                 | Albinet et al. <sup>133</sup><br>Albinet et al. <sup>388</sup><br>Andreou and Rapsomanikis <sup>225</sup><br>Sienra <sup>418</sup>                                                                             | Diesel vehicles<br>Gasoline vehicles<br>Road tunnel (traffic emissions)<br>Sintering furnace<br>Coal powder                                                                                                 | Oda et al. <sup>434</sup><br>Oda et al. <sup>434</sup><br>Oda et al. <sup>434</sup><br>Oda et al. <sup>434</sup><br>Oda et al. <sup>434</sup>                                                                                            | Anthracene + O <sub>3</sub>                                                          | Particle-phase, silica              | Perraudin et al. <sup>303</sup>                                                        |
| <b>Phenanthrene-4,5-dicarboxaldehyde</b> |                                                                                                                                |                                                                                                                                                                       |                                                                                                                                                                                                                |                                                                                                                                                                                                             |                                                                                                                                                                                                                                          | Pyrene + O <sub>3</sub>                                                              | Particle-phase, silica              | Miet et al. <sup>297</sup>                                                             |
| <b>Cyclopentaphenanthrene</b>            | Pertouli, Greece<br>Athens, Greece<br>Augsburg, Germany<br>Augsburg, Germany<br>Santiago and Temuco, Chile<br>Algiers, Algeria | Particulate Matter<br>Coarse and fine organic PM, two urban sites<br>Particulate and vapour-phase<br>PM2.5<br>PM2.5, urban areas<br>Airborne particulates, urban area | Alves and Pio <sup>399</sup><br>Andreou and Rapsomanikis <sup>225</sup><br>Liu et al. <sup>410</sup><br>Schnelle-Kreis et al. <sup>416</sup><br>Tsapakis et al. <sup>422</sup><br>Yassaa et al. <sup>424</sup> | Charcoal production<br>Gasoline and diesel vehicle exhausts<br>Brake lining particles<br>Road dust particles<br>Natural gas home appliances<br>Uncontrolled domestic waste combustion<br>Lignite combustion | Re-Poppi and Santiago-Silva <sup>437</sup><br>Rogge et al. <sup>440</sup><br>Rogge et al. <sup>439</sup><br>Rogge et al. <sup>439</sup><br>Rogge et al. <sup>438</sup><br>Sidhu et al. <sup>444</sup><br>Stefanova et al. <sup>445</sup> |                                                                                      |                                     |                                                                                        |
| <b>Cyclopenta[cd]pyrene-3(4H)-one</b>    | Augsburg, Germany                                                                                                              | Particulate and vapour-phase                                                                                                                                          | Liu et al. <sup>410</sup>                                                                                                                                                                                      |                                                                                                                                                                                                             |                                                                                                                                                                                                                                          |                                                                                      |                                     |                                                                                        |
| <b>Dibenzopyranone</b>                   |                                                                                                                                |                                                                                                                                                                       |                                                                                                                                                                                                                |                                                                                                                                                                                                             |                                                                                                                                                                                                                                          | Phenanthrene + OH<br>Phenanthrene + NO <sub>3</sub><br>Phenanthrene + O <sub>3</sub> | Gas-phase<br>Gas-phase<br>Gas-phase | Wang et al. <sup>221</sup><br>Wang et al. <sup>221</sup><br>Wang et al. <sup>221</sup> |
| <b>2,2'-diformylbiphenyl</b>             |                                                                                                                                |                                                                                                                                                                       |                                                                                                                                                                                                                |                                                                                                                                                                                                             |                                                                                                                                                                                                                                          | Phenanthrene + OH                                                                    | Gas-phase                           | Wang et al. <sup>221</sup>                                                             |

|                                                 |                                 |                                             |                                            |                                                             |                                 |                                |                        |                            |
|-------------------------------------------------|---------------------------------|---------------------------------------------|--------------------------------------------|-------------------------------------------------------------|---------------------------------|--------------------------------|------------------------|----------------------------|
|                                                 |                                 |                                             |                                            |                                                             |                                 | Phenanthrene + NO <sub>3</sub> | Gas-phase              | Wang et al. <sup>221</sup> |
|                                                 |                                 |                                             |                                            |                                                             |                                 | Phenanthrene + O <sub>3</sub>  | Gas-phase              | Wang et al. <sup>221</sup> |
| <b>4-oxapyrene-5-one</b>                        |                                 |                                             |                                            |                                                             |                                 | Pyrene + O <sub>3</sub>        | Particle-phase, silica | Miet et al. <sup>297</sup> |
| <b>Pyrene-4,5-dione</b>                         | Tempe, Arizona, USA             | PM2.5, urban area                           | Delhomme et al. <sup>403</sup>             |                                                             |                                 |                                |                        |                            |
| <b>1-hydroxypyrene</b>                          |                                 |                                             |                                            |                                                             |                                 | Pyrene + O <sub>3</sub>        | Particle-phase, silica | Miet et al. <sup>297</sup> |
| <b>1-Pyrenecarboxaldehyde</b>                   | Pertouli, Greece                | Particulate Matter                          | Alves and Pio <sup>399</sup>               |                                                             |                                 |                                |                        |                            |
|                                                 | Athens, Greece                  | Coarse and fine organic PM, two urban sites | Andreou and Rapsomanikis <sup>225</sup>    |                                                             |                                 |                                |                        |                            |
|                                                 | Munich, Germany                 | Ambient air samples, particulate-phase      | Schnelle-Kries et al. <sup>417</sup>       |                                                             |                                 |                                |                        |                            |
|                                                 | Santiago, Chile                 | PM10, Urban area                            | Sienra <sup>418</sup>                      |                                                             |                                 |                                |                        |                            |
|                                                 | Houston, Texas                  | Ambient air, particulate- and gas-phase     | Wilson et al. <sup>384</sup>               |                                                             |                                 |                                |                        |                            |
| <b>Pyrene-3,4-dicarboxylic acid anhydride</b>   | Houston, Texas                  | Ambient air, particulate- and gas-phase     | Wilson et al. <sup>384</sup>               |                                                             |                                 |                                |                        |                            |
| <b>7H-benz[c]anthracen-7-one</b>                | Boston, USA                     | Atmospheric particles – urban area          | Allen et al. <sup>398</sup>                |                                                             |                                 |                                |                        |                            |
|                                                 | Pertouli, Greece                | Particulate Matter                          | Alves and Pio <sup>399</sup>               |                                                             |                                 |                                |                        |                            |
| <b>7H-benz[de]anthracen-7-one (Benanthrone)</b> | Marseilles, France              | Urban, sub-urban and rural regions          | Albinet et al. <sup>133</sup>              | Fireplace wood combustion                                   | Fine et al. <sup>427</sup>      |                                |                        |                            |
|                                                 | Alpine Valley locations, France | Particulate and vapour-phase                | Albinet et al. <sup>388</sup>              | Agricultural burning                                        | Hays et al. <sup>430</sup>      |                                |                        |                            |
|                                                 | Boston, USA                     | Atmospheric particles – urban area          | Allen et al. <sup>398</sup>                | Diesel vehicles                                             | Oda et al. <sup>434</sup>       |                                |                        |                            |
|                                                 | Athens, Greece                  | Coarse and fine organic PM, two urban sites | Andreou and Rapsomanikis <sup>225</sup>    | Gasoline vehicles                                           | Oda et al. <sup>434</sup>       |                                |                        |                            |
|                                                 | Barcelona, Spain                | Urban aerosols                              | Castells et al. <sup>400</sup>             | Road tunnel (traffic emissions)                             | Oda et al. <sup>434</sup>       |                                |                        |                            |
|                                                 | Tokyo, Japan                    | Urban particulate matter, urban region      | Kojima et al. <sup>387</sup>               | Sintering furnace                                           | Oda et al. <sup>434</sup>       |                                |                        |                            |
|                                                 | Duisberg, Germany               | Airborne particulate matter                 | Konig et al. <sup>407</sup>                | Coal powder                                                 | Oda et al. <sup>434</sup>       |                                |                        |                            |
|                                                 | Portland, Oregon, USA           | Gas and particulate phase                   | Ligocki and Pankow <sup>426</sup>          | Gasoline and diesel vehicle exhausts                        | Rogge et al. <sup>440</sup>     |                                |                        |                            |
|                                                 | Augsburg, Germany               | Particulate and vapour-phase                | Liu et al. <sup>410</sup>                  | Brake lining particles                                      | Rogge et al. <sup>439</sup>     |                                |                        |                            |
|                                                 | Paris, France                   | Particulate Matter                          | Nicol et al. <sup>413</sup>                | Road dust particles                                         | Rogge et al. <sup>439</sup>     |                                |                        |                            |
|                                                 | Copenhagen, Denmark             | Airborne PM                                 | Nielsen et al. <sup>12</sup>               | Natural gas home appliances                                 | Rogge et al. <sup>438</sup>     |                                |                        |                            |
|                                                 | Campo Grande City, Brazil       | Particulate matter, ambient air             | Re-Poppi and Santiago-Silva <sup>415</sup> | Distillate fuel oil combustion for industrial-scale boilers | Rogge et al. <sup>441</sup>     |                                |                        |                            |
|                                                 | Augsburg, Germany               | PM2.5                                       | Schnelle-Kreis et al. <sup>416</sup>       | Wood burning in residential fireplaces                      | Rogge et al. <sup>442</sup>     |                                |                        |                            |
|                                                 | Stockholm, Sweden               | Airborne Particulates, heavy traffic area   | Strandell et al. <sup>421</sup>            | Uncontrolled domestic waste combustion                      | Sidhu et al. <sup>444</sup>     |                                |                        |                            |
|                                                 | Santiago and Temuco, Chile      | PM2.5, urban areas                          | Tsapakis et al. <sup>422</sup>             | Gasoline and diesel vehicle exhausts                        | Strandell et al. <sup>421</sup> |                                |                        |                            |
|                                                 | Algiers, Algeria                | Airborne particulates, urban area           | Yassaa et al. <sup>424</sup>               | Lignite combustion                                          | Stefanova et al. <sup>445</sup> |                                |                        |                            |

|                                     |                                                                                                                                                                                                                                                                                                                                          |                                                                                                                                                                                                                                                                                                                                                                                                                                                                               |                                                                                                                                                                                                                                                                                                                                                                                                                                                                                                                                                        |                                                                                                                                                                                                                               |                                                                                                                                                                                        |                                                    |                                                              |                                                          |
|-------------------------------------|------------------------------------------------------------------------------------------------------------------------------------------------------------------------------------------------------------------------------------------------------------------------------------------------------------------------------------------|-------------------------------------------------------------------------------------------------------------------------------------------------------------------------------------------------------------------------------------------------------------------------------------------------------------------------------------------------------------------------------------------------------------------------------------------------------------------------------|--------------------------------------------------------------------------------------------------------------------------------------------------------------------------------------------------------------------------------------------------------------------------------------------------------------------------------------------------------------------------------------------------------------------------------------------------------------------------------------------------------------------------------------------------------|-------------------------------------------------------------------------------------------------------------------------------------------------------------------------------------------------------------------------------|----------------------------------------------------------------------------------------------------------------------------------------------------------------------------------------|----------------------------------------------------|--------------------------------------------------------------|----------------------------------------------------------|
| <b>1H-benz[de]anthracen-1-one</b>   |                                                                                                                                                                                                                                                                                                                                          |                                                                                                                                                                                                                                                                                                                                                                                                                                                                               |                                                                                                                                                                                                                                                                                                                                                                                                                                                                                                                                                        | Gasoline and diesel vehicle exhausts<br>Brake lining particles<br>Road dust particles<br>Natural gas home appliances<br>Distillate fuel oil combustion for Industrial-scale boilers<br>Wood burning in residential fireplaces | Rogge et al. <sup>440</sup><br>Rogge et al. <sup>439</sup><br>Rogge et al. <sup>439</sup><br>Rogge et al. <sup>438</sup><br>Rogge et al. <sup>441</sup><br>Rogge et al. <sup>442</sup> |                                                    |                                                              |                                                          |
| <b>Benz[a]anthracene-7,12-dione</b> | Marseilles, France<br>Alpine Valley locations, France<br>Athens, Greece<br>Barcelona, Spain<br>Barcelona, Spain<br>Columbus, USA<br>Tempe, Arizona, USA<br>Osaka, Japan<br>Duisberg, Germany<br>Portland, Oregon, USA<br>Augsburg, Germany<br>Paris, France<br>Munich, Germany<br>Augsburg, Germany<br>Santiago, Chile<br>Houston, Texas | Urban, sub-urban and rural regions<br>Particulate and vapour-phase<br>Coarse and fine organic PM, two urban sites<br>Airborne particulate matter<br>Urban aerosols<br>Airborne particles, residential area<br>PM2.5<br>Airborne particles<br>Airborne particulate matter<br>Gas and particulate phase<br>Particulate and vapour-phase<br>Particulate Matter<br>Ambient air samples, particulate-phase<br>PM2.5<br>PM10, Urban area<br>Ambient air, particulate- and gas-phase | Albinet et al. <sup>133</sup><br>Albinet et al. <sup>388</sup><br>Andreou and Rapsomanikis <sup>225</sup><br>Bayona et al. <sup>381</sup><br>Castells et al. <sup>400</sup><br>Chuang et al. <sup>383</sup><br>Delhomme et al. <sup>403</sup><br>Kameda et al. <sup>425</sup><br>Konig et al. <sup>407</sup><br>Ligocki and Pankow <sup>426</sup><br>Liu et al. <sup>410</sup><br>Nicol et al. <sup>413</sup><br>Schnelle-Kries et al. <sup>417</sup><br>Schnelle-Kreis et al. <sup>416</sup><br>Sienra <sup>418</sup><br>Wilson et al. <sup>384</sup> | Motor vehicle traffic, Roadway tunnel<br>Natural gas home appliances<br>Uncontrolled domestic waste combustion<br>Lignite combustion                                                                                          | Fraser et al. <sup>429</sup><br>Rogge et al. <sup>438</sup><br>Sidhu et al. <sup>444</sup><br>Stefanova et al. <sup>445</sup>                                                          | B(a)A + NO <sub>3</sub><br>B(a)A + NO <sub>3</sub> | Particle-phase, azailic acid<br>Particle-phase, azailic acid | Liu et al. <sup>260</sup><br>Zhang et al. <sup>259</sup> |
| <b>Benz[a]anthracene-9,10-dione</b> | Athens, Greece                                                                                                                                                                                                                                                                                                                           | Coarse and fine organic PM, two urban sites                                                                                                                                                                                                                                                                                                                                                                                                                                   | Andreou and Rapsomanikis <sup>225</sup>                                                                                                                                                                                                                                                                                                                                                                                                                                                                                                                |                                                                                                                                                                                                                               |                                                                                                                                                                                        |                                                    |                                                              |                                                          |
| <b>Chrysene-5,6-dione</b>           | Munich, Germany<br>Munich, Germany                                                                                                                                                                                                                                                                                                       | Generated soot particles; and road-side air sample<br>PM2.5, road-side air samples                                                                                                                                                                                                                                                                                                                                                                                            | Lintelmann et al. <sup>408</sup><br>Lintelmann et al. <sup>409</sup>                                                                                                                                                                                                                                                                                                                                                                                                                                                                                   |                                                                                                                                                                                                                               |                                                                                                                                                                                        |                                                    |                                                              |                                                          |
| <b>Benzo[a]fluorenone</b>           | Marseilles, France<br>Alpine Valley locations, France<br>Augsburg, Germany                                                                                                                                                                                                                                                               | Urban, sub-urban and rural regions<br>Particulate and vapour-phase<br>PM2.5                                                                                                                                                                                                                                                                                                                                                                                                   | Albinet et al. <sup>133</sup><br>Albinet et al. <sup>388</sup><br>Schnelle-Kreis et al. <sup>416</sup>                                                                                                                                                                                                                                                                                                                                                                                                                                                 |                                                                                                                                                                                                                               |                                                                                                                                                                                        |                                                    |                                                              |                                                          |



|                                    |                                 |                                                    |                                            |                                        |                              |                        |                         |                              |
|------------------------------------|---------------------------------|----------------------------------------------------|--------------------------------------------|----------------------------------------|------------------------------|------------------------|-------------------------|------------------------------|
| <b>Benzo[b]fluorenone</b>          | Marseilles, France              | Urban, sub-urban and rural regions                 | Albinet et al. <sup>133</sup>              |                                        |                              |                        |                         |                              |
|                                    | Alpine Valley locations, France | Particulate and vapour-phase                       | Albinet et al. <sup>388</sup>              |                                        |                              |                        |                         |                              |
|                                    | Tempe, Arizona, USA             | PM2.5                                              | Delhomme et al. <sup>403</sup>             |                                        |                              |                        |                         |                              |
|                                    | Campo Grande City, Brazil       | Particulate matter, ambient air                    | Re-Poppi and Santiago-Silva <sup>415</sup> |                                        |                              |                        |                         |                              |
|                                    | Augsburg, Germany               | PM2.5                                              | Schnelle-Kreis et al. <sup>416</sup>       |                                        |                              |                        |                         |                              |
| <b>Benzo[c]fluorenone</b>          | Augsburg, Germany               | PM2.5                                              | Schnelle-Kreis et al. <sup>416</sup>       |                                        |                              |                        |                         |                              |
| <b>11H-Benzo[a]fluorene-11-one</b> | Boston, USA                     | Atmospheric particles – urban area                 | Allen et al. <sup>398</sup>                |                                        |                              |                        |                         |                              |
|                                    | Duisberg, Germany               | Airborne particulate matter                        | Konig et al. <sup>407</sup>                |                                        |                              |                        |                         |                              |
|                                    | Augsburg, Germany               | Particulate and vapour-phase                       | Liu et al. <sup>410</sup>                  |                                        |                              |                        |                         |                              |
|                                    | Munich, Germany                 | Ambient air samples, particulate-phase             | Schnelle-Kries et al. <sup>417</sup>       |                                        |                              |                        |                         |                              |
|                                    | Augsburg, Germany               | PM2.5                                              | Schnelle-Kreis et al. <sup>416</sup>       |                                        |                              |                        |                         |                              |
| <b>11H-Benzo[b]fluorene-11-one</b> | Boston, USA                     | Atmospheric particles – urban area                 | Allen et al. <sup>398</sup>                |                                        |                              |                        |                         |                              |
|                                    | Duisberg, Germany               | Airborne particulate matter                        | Konig et al. <sup>407</sup>                |                                        |                              |                        |                         |                              |
|                                    | Augsburg, Germany               | Particulate and vapour-phase                       | Liu et al. <sup>410</sup>                  |                                        |                              |                        |                         |                              |
|                                    | Munich, Germany                 | Ambient air samples, particulate-phase             | Schnelle-Kries et al. <sup>417</sup>       |                                        |                              |                        |                         |                              |
|                                    | Augsburg, Germany               | PM2.5                                              | Schnelle-Kreis et al. <sup>416</sup>       |                                        |                              |                        |                         |                              |
| <b>Benzo[cd]pyrene</b>             | Boston, USA                     | Atmospheric particles – urban area                 | Allen et al. <sup>398</sup>                | Motor vehicle traffic, Roadway tunnel  | Fraser et al. <sup>429</sup> |                        |                         |                              |
|                                    | Augsburg, Germany               | Particulate and vapour-phase                       | Liu et al. <sup>410</sup>                  | Gasoline and diesel vehicle exhausts   | Rogge et al. <sup>440</sup>  |                        |                         |                              |
|                                    | Stockholm, Sweden               | Airborne Particulates, heavy traffic area          | Strandell et al. <sup>421</sup>            | Brake lining particles                 | Rogge et al. <sup>439</sup>  |                        |                         |                              |
|                                    |                                 |                                                    |                                            | Wood burning in residential fireplaces | Rogge et al. <sup>442</sup>  |                        |                         |                              |
|                                    |                                 |                                                    | Gasoline and diesel vehicle exhausts       | Strandell et al. <sup>421</sup>        |                              |                        |                         |                              |
| <b>Benzo[a]pyrene-1,6-dione</b>    | Munich, Germany                 | Particulate matter                                 | Koerber et al. <sup>406</sup>              |                                        |                              | B(a)P + O <sub>3</sub> | Particle-phase, filters | Letzel et al. <sup>305</sup> |
|                                    | Munich, Germany                 | Generated soot particles; and road-side air sample | Lintelmann et al. <sup>408</sup>           |                                        |                              |                        |                         |                              |
|                                    | Munich, Germany                 | PM2.5, road-side air samples                       | Lintelmann et al. <sup>409</sup>           |                                        |                              |                        |                         |                              |
| <b>Benzo[a]pyrene-3,6-dione</b>    | Munich, Germany                 | Particulate matter                                 | Koerber et al. <sup>406</sup>              |                                        |                              | B(a)P + O <sub>3</sub> | Particle-phase, filters | Letzel et al. <sup>305</sup> |
|                                    | Munich, Germany                 | Generated soot particles; and road-side air sample | Lintelmann et al. <sup>408</sup>           |                                        |                              |                        |                         |                              |
|                                    | Munich, Germany                 | PM2.5, road-side air samples                       | Lintelmann et al. <sup>409</sup>           |                                        |                              |                        |                         |                              |
| <b>Benzo[a]pyrene-4,5-dione</b>    | Munich, Germany                 | Generated soot particles; and road-side air sample | Lintelmann et al. <sup>408</sup>           |                                        |                              | B(a)P + O <sub>3</sub> | Particle-phase, filters | Letzel et al. <sup>305</sup> |
|                                    | Munich, Germany                 | PM2.5, road-side air samples                       | Lintelmann et al. <sup>409</sup>           |                                        |                              |                        |                         |                              |

|                                   |                 |                                                    |                                  |  |  |                        |                         |                              |
|-----------------------------------|-----------------|----------------------------------------------------|----------------------------------|--|--|------------------------|-------------------------|------------------------------|
| <b>Benzo[a]pyrene-7,8-dione</b>   | Munich, Germany | Generated soot particles; and road-side air sample | Lintelmann et al. <sup>408</sup> |  |  |                        |                         |                              |
|                                   | Munich, Germany | PM2.5, road-side air samples                       | Lintelmann et al. <sup>409</sup> |  |  |                        |                         |                              |
| <b>Benzo[a]pyrene-6,12-dione</b>  | Boston, USA     | Atmospheric particles – urban area                 | Allen et al. <sup>398</sup>      |  |  | B(a)P + O <sub>3</sub> | Particle-phase, filters | Letzel et al. <sup>305</sup> |
|                                   | Munich, Germany | Particulate matter                                 | Koerber et al. <sup>406</sup>    |  |  |                        |                         |                              |
| <b>Benzo[a]pyrene-11,12-dione</b> | Munich, Germany | PM2.5, road-side air samples                       | Lintelmann et al. <sup>409</sup> |  |  |                        |                         |                              |
